# Supplementary material for: Dickkopf‐3 Ablation Attenuates the Development of Atherosclerosis in ApoE‐Deficient Mice
Source: PubMed Central journal article supplement — J Am Heart Assoc. 2017 Feb 20;6(2):e004690. doi: 10.1161/JAHA.116.004690 (PMC5523766; doi:10.1161/jaha.116.004690), 2017-02-20
Supplement: JAH3-6-e004690-s001.pdf [file JAH3-6-e004690-s001.pdf]

# **Supplemental Material**

**Figure S1. Expression of DKK3 in endothelial cell and VSMCs.**

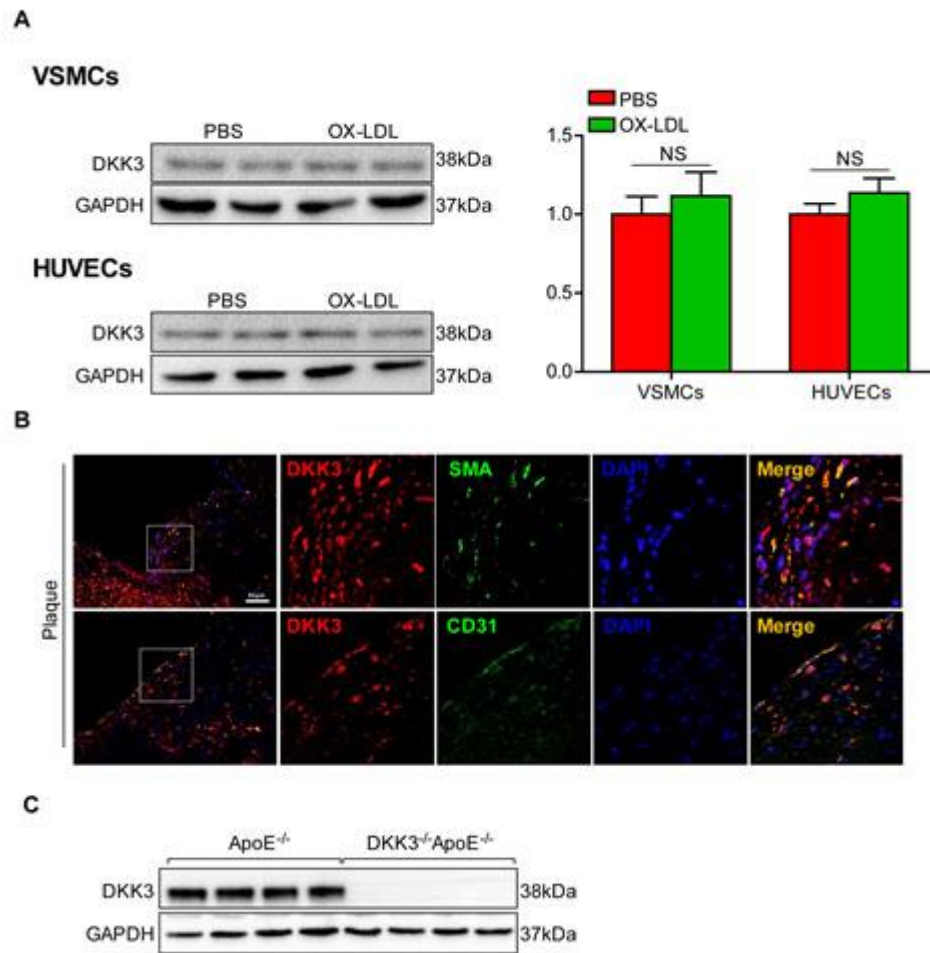

**A.** Western blot analysis of DKK3 expression in HUVECs and VSMCs upon Ox-LDL treatment. **B.** Representative images showing double-immunofluorescence staining for DKK3 (Red), SMA (smooth muscle cell, Green) or CD31 (endothelial cell, Green) in human plaques.
